# Supplementary material for: Estimating the delivery costs of COVID-19 vaccination using the COVID-19 Vaccine Introduction and deployment Costing (CVIC) tool: the Lao People’s Democratic Republic experience
Source: Springer Nature journal article supplement (doi:10.1186/s12916-023-02944-1), 2023-07-10
Supplement: MOESM1 [file 25599192]

**Appendices of “Estimating the delivery costs of COVID-19 vaccination using the COVID-19 Vaccine Introduction and deployment Costing (CVIC) tool: the Lao People’s Democratic Republic experience”**

**Authors: Karene Hoi Ting YEUNG, Eunkyong KIM, YAP Wei Aun, Chansay PATHAMMAVONG, Lauren FRANZEL, Yu Lee PARK, Peter COWLEY, Ulla Kou GRIFFITHS, Raymond Christiaan W. HUTUBESSY**

**DOI: 10.1186/s12916-023-02944-1**

**Contents**

Appendix 1. Timeline for the development and key milestones of the COVID-19 Vaccine Introduction and deployment Costing (CVIC) tool..... 2

Appendix 2. Prepopulated data and sources in the COVID-19 Vaccine Introduction and deployment Costing (CVIC) tool ..... 3

## Appendix 1. Timeline for the development and key milestones of the COVID-19 Vaccine Introduction and deployment Costing (CVIC) tool

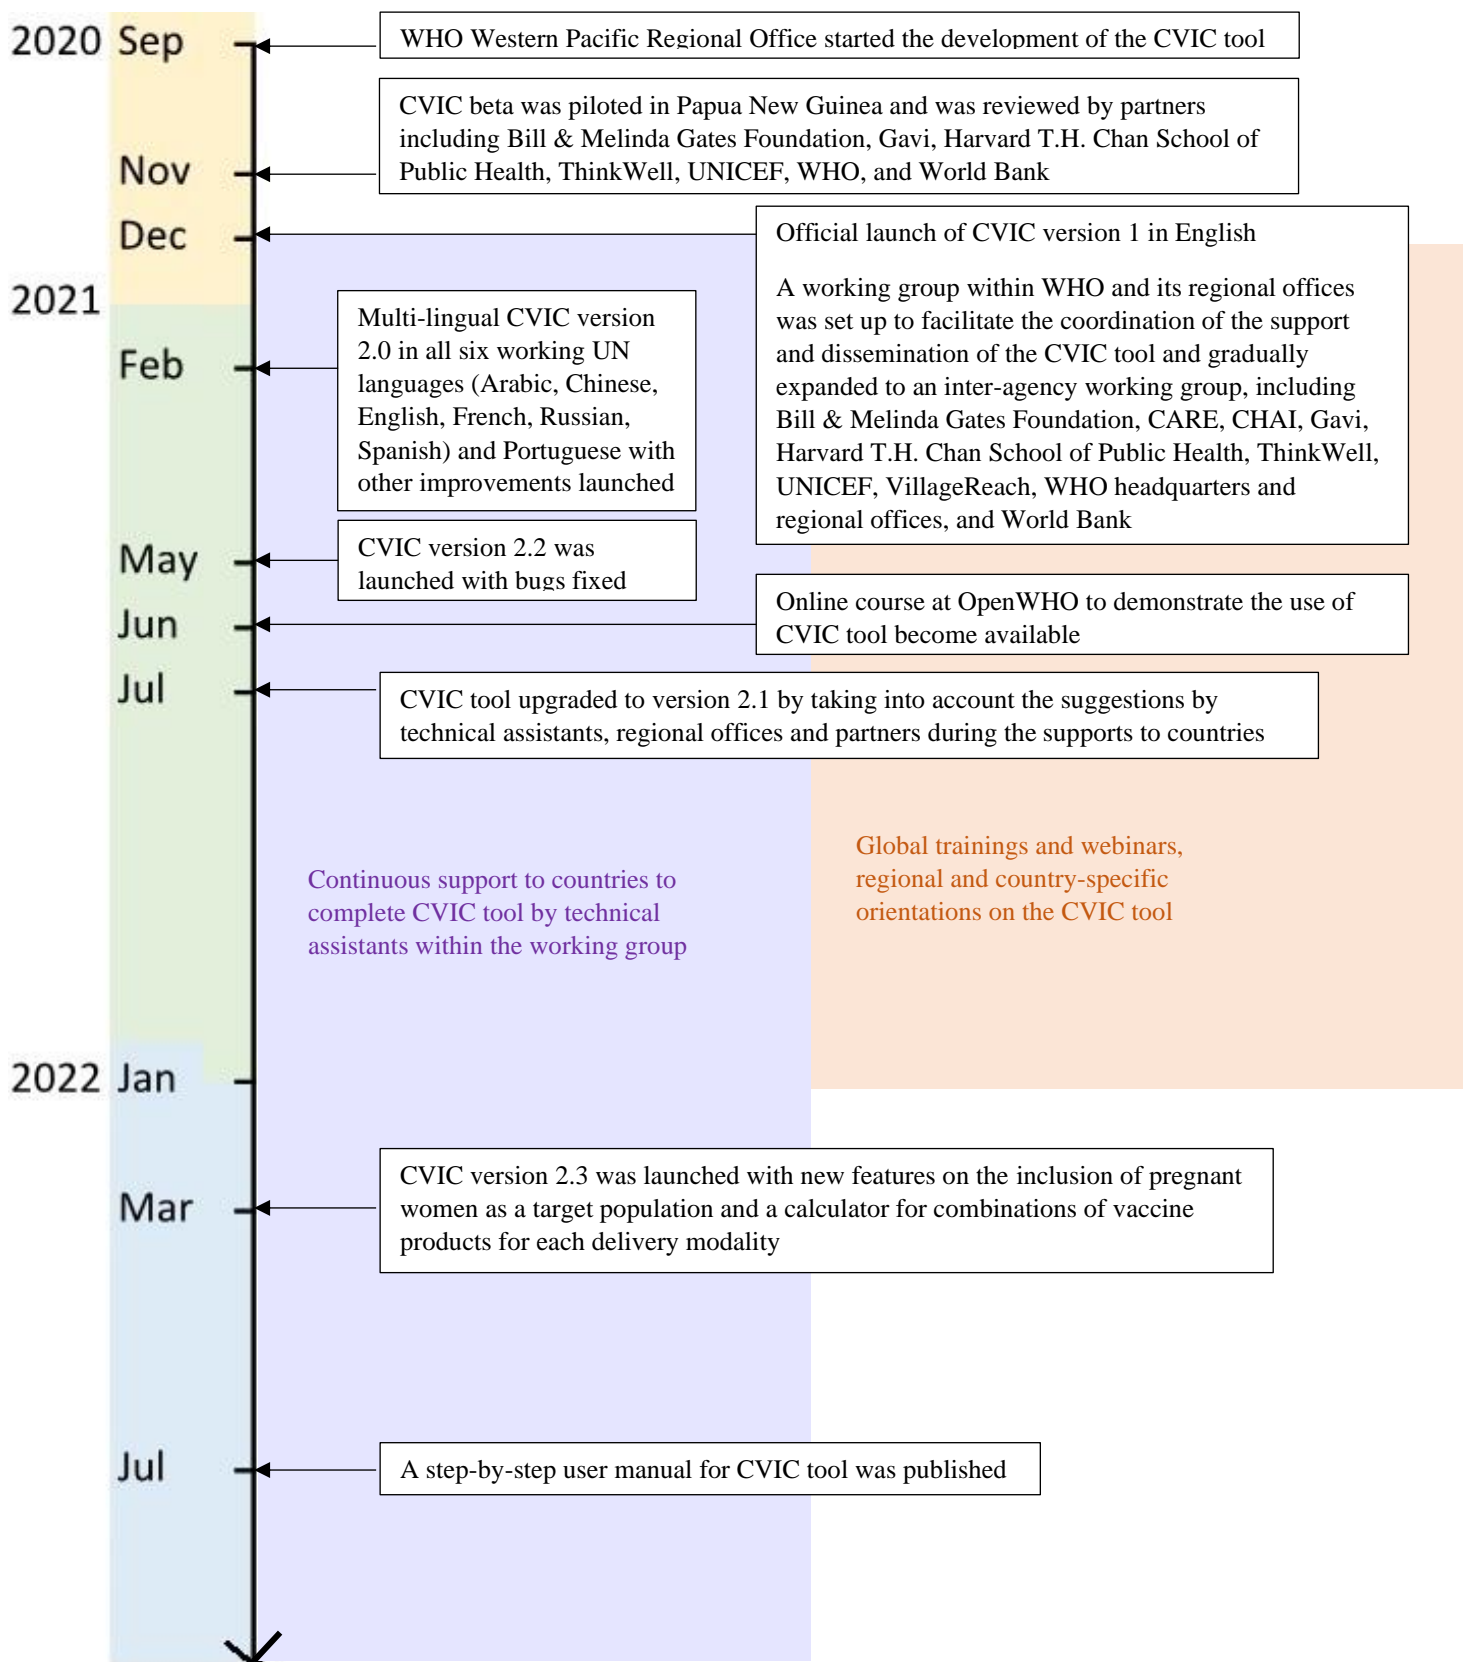

## Appendix 2. Prepopulated data and sources in the COVID-19 Vaccine Introduction and deployment Costing (CVIC) tool

For user convenience and consistency, key parameters from global databases were compiled and included as overridable defaults in the CVIC tool.

| Data                                                                                                                                                                         | Source                                                                                                                                                                                                                                                                                                                                                               |
|------------------------------------------------------------------------------------------------------------------------------------------------------------------------------|----------------------------------------------------------------------------------------------------------------------------------------------------------------------------------------------------------------------------------------------------------------------------------------------------------------------------------------------------------------------|
| Covid-19 vaccine specifications                                                                                                                                              | WHO<br><a href="https://www.who.int/tools/covid-19-vaccine-introduction-toolkit#vaccine%20specific%20resources">https://www.who.int/tools/covid-19-vaccine-introduction-toolkit#vaccine%20specific%20resources</a>                                                                                                                                                   |
| Country-level health financing data                                                                                                                                          | WHO Global Health Expenditure Database - Preliminary Data for 2018                                                                                                                                                                                                                                                                                                   |
| Country-level population and demographic data                                                                                                                                | United Nations 2019 Revision of World Population Prospects; World Development Indicator (SP.POP.TOTL) for 2020                                                                                                                                                                                                                                                       |
| Crude birth rate                                                                                                                                                             | World Development Indicator (SP.DYN.CBRT.IN) for 2018                                                                                                                                                                                                                                                                                                                |
| Gross monthly salaries for human resources for health                                                                                                                        | Serje, Juliana, Melanie Y. Bertram, Callum Brindley, and Jeremy A. Lauer. 2018. "Global Health Worker Salary Estimates: An Econometric Analysis of Global Earnings Data." Cost Effectiveness and Resource Allocation 16 (1): 10.<br><a href="https://doi.org/10.1186/s12962-018-0093-z">https://doi.org/10.1186/s12962-018-0093-z</a> . WHO-CHOICE. Updated to 2020. |
| Supply of human resources for health                                                                                                                                         | WHO estimation of stock in 2020 based on latest reported health workforce stock in the National Health Workforce Accounts                                                                                                                                                                                                                                            |
| Maximum redeployable human resources for health                                                                                                                              | Boniol M et al. Estimating the health workforce requirements and costing to reach 70% COVID-19 vaccination coverage by mid-2022: a modelling study and global estimates. BMJ Open 2022;12:e063059. doi: 10.1136/bmjopen-2022-063059)                                                                                                                                 |
| Country context and other miscellaneous parameters                                                                                                                           |                                                                                                                                                                                                                                                                                                                                                                      |
| - Foreign currency exchange rates                                                                                                                                            | - FloatRates (aggregated from central banks)<br><a href="http://www.floatrates.com/daily/usd.xml">http://www.floatrates.com/daily/usd.xml</a>                                                                                                                                                                                                                        |
| - Country surface area                                                                                                                                                       | - World Development Indicator (AG.SRF.TOTL.K2) for 2018                                                                                                                                                                                                                                                                                                              |
| - WHO region                                                                                                                                                                 | - WHO                                                                                                                                                                                                                                                                                                                                                                |
| - World Bank income group, World Bank lending category, Pacific Island State status, Highly Indebted Poor Country status, and Fragile and Conflict Affected Situation status | - World Bank                                                                                                                                                                                                                                                                                                                                                         |
| - Membership of international bodies                                                                                                                                         | - Relevant body or initiative                                                                                                                                                                                                                                                                                                                                        |
| Data sources which are used for user informational purposes but are not used as defaults in estimations:                                                                     |                                                                                                                                                                                                                                                                                                                                                                      |
| - Health infrastructure                                                                                                                                                      | - WHO Global Health Observatory (as of October 2020)                                                                                                                                                                                                                                                                                                                 |
| - Diabetes prevalence (% of population ages 20 to 79)                                                                                                                        | - World Development Indicator (SH.STA.DIAB.ZS) for 2019                                                                                                                                                                                                                                                                                                              |
| - Prevalence of prevalence of obesity among adults, BMI >= 30 (crude estimate) (%)                                                                                           | - WHO Global Health Observatory (as of October 2020)                                                                                                                                                                                                                                                                                                                 |
| - Urbanization                                                                                                                                                               | - World Development Indicator (SP.URB.TOTL.IN.ZS) for 2019                                                                                                                                                                                                                                                                                                           |
| - Household size                                                                                                                                                             | - United Nations, Department of Economic and Social Affairs, Population Division (2019). Database on Household Size and Composition 2019.<br><a href="https://population.un.org/Household/index.html">https://population.un.org/Household/index.html</a>                                                                                                             |
